# Supplementary material for: Exposure to Bullying and General Psychopathology: A Prospective, Longitudinal Study
Source: Springer Nature journal article supplement (doi:10.1007/s10802-020-00760-2), 2021-01-22
Supplement: MOESM1 [file 18793442]

S1.1 Environmental risk exposure items - Prenatal period

|                            | <i>Valid Range</i> | <i>M (SD)</i> | <i>Scale</i>           | <i>Time Points</i>  | <i>Measurement Unit</i> | <i>Items</i>                                                                                                                                                                                                                                                                                                                                                                                                                                  |
|----------------------------|--------------------|---------------|------------------------|---------------------|-------------------------|-----------------------------------------------------------------------------------------------------------------------------------------------------------------------------------------------------------------------------------------------------------------------------------------------------------------------------------------------------------------------------------------------------------------------------------------------|
| <b>Life events</b>         | 0-11               | 2.33 (1.72)   | Life events scale      | 18w gestation       | Dichotomous             | Your partner died<br>One of your children died<br>A friend or relative died<br>One of your children was ill<br>Your partner was ill<br>A friend or relative was ill<br>You were admitted to hospital<br>You were very ill<br>Your partner lost his job<br>Your partner had problems at work<br>You had problems at work                                                                                                                       |
|                            |                    |               |                        |                     |                         | You lost your job<br>You moved house<br>You were bleeding and thought you might miscarry<br>You started a new job<br>You had a test to see if your baby was abnormal<br>Result on a test that suggested your baby might not be normal<br>You were told that you were going to have twins<br>You heard something that happened might be harmful to the baby<br>You took an examination<br>Your house or car was burgled<br>You had an accident |
| <b>Contextual Risks</b>    | 0-5                | 0.55 (0.87)   | Life events scale      | 18w gestation       | Dichotomous             | You had a major financial problem<br>You became homeless<br>Your income was reduced                                                                                                                                                                                                                                                                                                                                                           |
|                            |                    |               | Family adversity index | Pregnancy composite | Dichotomous             | Housing adequacy<br>Housing Basic Living<br>Housing Defects<br>Financial difficulties                                                                                                                                                                                                                                                                                                                                                         |
| <b>Parental Risks</b>      | 0-9                | 0.49 (0.79)   | Life events scale      | 18w gestation       | Dichotomous             | You were in trouble with the law<br>Your partner was in trouble with the law<br>You were convicted of an offence<br>You attempted suicide<br>You tried to have an abortion                                                                                                                                                                                                                                                                    |
|                            |                    |               | Family adversity index | Pregnancy composite | Dichotomous             | Early parenthood<br>Maternal education<br>Psychopathology of mother<br>Substance abuse<br>Crime trouble with police<br>Crime convictions                                                                                                                                                                                                                                                                                                      |
| <b>Interpersonal Risks</b> | 0-13               | 1.18 (1.51)   | Life events scale      | 18w gestation       | Dichotomous             | You found that your partner didn't want your child<br>You argued with your partner<br>You had arguments with your family or friends<br>Your partner hurt you physically<br>Your partner hurt your children physically<br>Your partner was emotionally cruel to you                                                                                                                                                                            |
|                            |                    |               | Family adversity index | Pregnancy composite | Dichotomous             | Partner Status<br>Partner Affection<br>Partner cruelty<br>Family Size                                                                                                                                                                                                                                                                                                                                                                         |
|                            |                    |               |                        |                     |                         | Your partner was emotionally cruel to your children<br>You were divorced<br>Your partner went away<br>You and your partner separated<br>Family Major problems<br>Partner Support<br>Social Network - Emotional<br>Social Network - Practical                                                                                                                                                                                                  |

Model fit indices for the prenatal period were  $\chi^2(2) = 163.581, p < .001$ ; CFI = .958; SRMR = 0.026; RMSEA = .075.

S1.2 Environmental risk items - Early Childhood (birth - age 7)

|                             | <i>Valid Range</i> | <i>M (SD)</i> | <i>Scale</i>           | <i>Time points</i>               | <i>Measurement unit</i>                                                                                      | <i>Items</i>                                                                                                                                                                                                                                                                                                                                                                                                                                                                                                                                                                                                                                                                                                                                                                                                                                                               |
|-----------------------------|--------------------|---------------|------------------------|----------------------------------|--------------------------------------------------------------------------------------------------------------|----------------------------------------------------------------------------------------------------------------------------------------------------------------------------------------------------------------------------------------------------------------------------------------------------------------------------------------------------------------------------------------------------------------------------------------------------------------------------------------------------------------------------------------------------------------------------------------------------------------------------------------------------------------------------------------------------------------------------------------------------------------------------------------------------------------------------------------------------------------------------|
| <b>Life Events</b>          | 0-83               | 27.51 (11.96) | Life events scale      | 8wk, 8m, 21m<br>3y, 4y, 5y, 6y   | Dichotomous                                                                                                  | Your partner died<br>One of your children died<br>A friend or relative died<br>One of your children was ill<br>Your partner was ill<br>A friend or relative was ill<br>You were admitted to hospital<br>You were very ill<br>Your partner lost his job<br>Your partner had problems at work<br>You had problems at work<br>You lost your job<br>You moved house<br>You were bleeding and thought you might miscarry<br>You started a new job<br>You had a test to see if your baby was abnormal<br>Result on a test that suggested your baby might not be normal<br>You were told that you were going to have twins<br>You heard something that happened might be harmful to the baby<br>You took an examination<br>Your house or car was burgled<br>You had an accident<br>You became pregnant<br>You returned to work<br>Your partner started a new job<br>Your pet died |
|                             |                    |               | Life events - child    | 18m, 30m,<br>3y, 4y, 5y, 6y      | Dichotomous                                                                                                  | Child has been taken into care<br>Child's pet died<br>Child moved home<br>Child had shock or fright<br>Child has had someone in family die<br>Child has been separated from mother<br>Child has been separated from father<br>Child has had a new mother or father<br>Child has had a new brother or sister<br>Child has been admitted to hospital<br>Child has changed their caretaker<br>Child has been separated from someone else<br>Child has started a new school<br>Child has lost their best friend<br>Child started school                                                                                                                                                                                                                                                                                                                                        |
| <b>Contextual Risks</b>     | 0-20               | 3.53 (3.05)   | Life events scale      | 8wk, 8m, 21m<br>3y, 4y, 5y, 6y   | Dichotomous                                                                                                  | You had a major financial problem<br>You became homeless<br>Your income was reduced                                                                                                                                                                                                                                                                                                                                                                                                                                                                                                                                                                                                                                                                                                                                                                                        |
|                             |                    |               | Family adversity index | 0-2y composite<br>2-4y composite | Dichotomous                                                                                                  | Housing adequacy<br>Housing Basic Living<br>Housing Defects<br>Financial difficulties                                                                                                                                                                                                                                                                                                                                                                                                                                                                                                                                                                                                                                                                                                                                                                                      |
| <b>Parental Risks</b>       | 0-23               | 1.21 (1.75)   | Life events scale      | 8wk, 8m, 21m<br>3y, 4y, 5y, 6y   | Dichotomous                                                                                                  | You were in trouble with the law<br>Your partner was in trouble with the law<br>You were convicted of an offence<br>You attempted suicide<br>You tried to have an abortion                                                                                                                                                                                                                                                                                                                                                                                                                                                                                                                                                                                                                                                                                                 |
|                             |                    |               | Family adversity index | 0-2y composite<br>2-4y composite | Dichotomous                                                                                                  | Early parenthood<br>Maternal education<br>Psychopathology of mother<br>Substance abuse<br>Crime trouble with police<br>Crime convictions                                                                                                                                                                                                                                                                                                                                                                                                                                                                                                                                                                                                                                                                                                                                   |
| <b>Interpersonal Risks</b>  | 0-47               | 11.82 (7.52)  | Life events scale      | 8wk, 8m, 21m<br>3y, 4y, 5y, 6y   | Dichotomous                                                                                                  | You found that your partner didn't want your child<br>You argued with your partner<br>You had arguments with your family or friends<br>Your partner hurt you physically<br>Your partner was emotionally cruel to you<br>You were divorced<br>Your partner went away<br>You and your partner separated                                                                                                                                                                                                                                                                                                                                                                                                                                                                                                                                                                      |
|                             |                    |               | Family adversity index | 0-2y composite<br>2-4y composite | Dichotomous                                                                                                  | Partner Status<br>Partner Affection<br>Partner cruelty<br>Family Size<br>Family major problems<br>Low partner support<br>Low social network, emotional<br>Low social network, practical                                                                                                                                                                                                                                                                                                                                                                                                                                                                                                                                                                                                                                                                                    |
|                             |                    |               | Partner relationship   | 21m, 33m, 6y                     | Nominal<br><i>Collapsed</i><br>0 = No<br>1 = Yes, mom or/and partner                                         | Shouted in anger in past 3 months<br>Hit or slapped in past 3 months<br>Threw something in anger in past 3 mths                                                                                                                                                                                                                                                                                                                                                                                                                                                                                                                                                                                                                                                                                                                                                            |
|                             |                    |               | Harsh Parenting        | 18m, 2y, 3y<br>4y, 6y            | Ordinal, coding system<br>differed across time points<br><i>Summed scores and<br/>performed median split</i> | Shout during tantrums/when naughty<br>Smack during tantrums/when naughty                                                                                                                                                                                                                                                                                                                                                                                                                                                                                                                                                                                                                                                                                                                                                                                                   |
| <b>Direct victimization</b> | 0-17               | 0.45 (1.24)   | Life events - child    | 18m, 30m,<br>3y, 4y, 5y, 6y      | Dichotomous                                                                                                  | Child has been physically hurt by someone<br>Child has been sexually abused                                                                                                                                                                                                                                                                                                                                                                                                                                                                                                                                                                                                                                                                                                                                                                                                |
|                             |                    |               | Life events scale      | 8wk, 8m, 21m<br>3y, 4y, 5y, 6y   | Dichotomous                                                                                                  | Partner was physically cruel to child<br>Mother was physically cruel to child<br>Partner was emotionally cruel to child<br>Mother was emotionally cruel to child                                                                                                                                                                                                                                                                                                                                                                                                                                                                                                                                                                                                                                                                                                           |

$\chi^2(5) = 708.866, p < .001; CFI = .921; SRMR = 0.039; RMSEA = .099.$

S1.3 Environmental risk items - Mid Childhood (age 8 - 12)

|                             | <i>Valid Range</i> | <i>M (SD)</i> | <i>Scale</i>         | <i>Time points</i> | <i>Measurement unit</i>                                       | <i>Items</i>                                                                                                                                                                                                                                                                                                                                                                                                                                                                                                                                                                                                                                                                                                                                                                                                                                                                               |
|-----------------------------|--------------------|---------------|----------------------|--------------------|---------------------------------------------------------------|--------------------------------------------------------------------------------------------------------------------------------------------------------------------------------------------------------------------------------------------------------------------------------------------------------------------------------------------------------------------------------------------------------------------------------------------------------------------------------------------------------------------------------------------------------------------------------------------------------------------------------------------------------------------------------------------------------------------------------------------------------------------------------------------------------------------------------------------------------------------------------------------|
| <b>Life Events</b>          | 0-30               | 7.27 (4.50)   | Life events scale    | 9 v, 11 v          | Dichotomous                                                   | Your partner died<br>One of your children died<br>A friend or relative died<br>One of your children was ill<br>Your partner was ill<br>A friend or relative was ill<br>You were admitted to hospital<br>You were very ill<br>Your partner lost his job<br>Your partner had problems at work<br>You had problems at work<br>You lost your job<br>You moved house<br>You were bleeding and thought you might miscarry<br>You started a new job<br>You had a test to see if your baby was abnormal<br>Result on a test that suggested your baby might not be normal<br>You were told that you were going to have twins<br>You heard something that happened might be harmful to the baby<br>You took an examination<br>Your house or car was burgled<br>You had an accident<br>You returned to work<br>One of your children started school<br>Your partner started a new job<br>Your pet died |
|                             |                    |               | Life events - child  | 9v                 | Dichotomous                                                   | Child has been taken into care<br>Child's pet died<br>Child moved home<br>Child had shock or fright<br>Child has had someone in family die<br>Child has been separated from mother<br>Child has been separated from father<br>Child has had a new mother or father<br>Child has had a new brother or sister<br>Child has been admitted to hospital<br>Child has changed their caretaker<br>Child has been separated from someone else<br>Child has started a new school<br>Child has lost their best friend                                                                                                                                                                                                                                                                                                                                                                                |
| <b>Contextual Risks</b>     | 0-6                | 0.50 (0.82)   | Life events scale    | 9y, 11y            | Dichotomous                                                   | You had a major financial problem<br>You became homeless<br>Your income was reduced<br>You were in trouble with the law<br>Your partner was in trouble with the law<br>You were convicted of an offence<br>You attempted suicide<br>You tried to have an abortion<br>You found that your partner didn't want your child<br>You argued with your partner<br>You had arguments with your family or friends<br>Your partner hurt you physically<br>You were divorced<br>Your partner went away<br>You and your partner separated                                                                                                                                                                                                                                                                                                                                                              |
| <b>Parental Risks</b>       | 0-4                | 0.06 (0.29)   | Life events scale    | 9v, 11v            | Dichotomous                                                   |                                                                                                                                                                                                                                                                                                                                                                                                                                                                                                                                                                                                                                                                                                                                                                                                                                                                                            |
| <b>Interpersonal Risks</b>  | 0-15               | 2.05 (2.09)   | Life events scale    | 9y, 11y            | Dichotomous                                                   |                                                                                                                                                                                                                                                                                                                                                                                                                                                                                                                                                                                                                                                                                                                                                                                                                                                                                            |
|                             |                    |               | Partner relationship | 9y                 | Nominal<br>Collapsed<br>0 = No<br>1 = Yes, mom or/and partner | Shouted in anger in past 3 months<br>Hit or slapped in past 3 months<br>Threw something in anger in past 3 mths                                                                                                                                                                                                                                                                                                                                                                                                                                                                                                                                                                                                                                                                                                                                                                            |
|                             |                    |               | Harsh Parenting      | 9v                 | Ordinal<br>Collapsed<br>0 = Never<br>1 = Rarely - every day   | Child slapped/hit                                                                                                                                                                                                                                                                                                                                                                                                                                                                                                                                                                                                                                                                                                                                                                                                                                                                          |
| <b>Direct victimization</b> | 0-7                | 0.10 (0.41)   | Life events - child  | 9y                 | Dichotomous                                                   | Child has been physically hurt by someone<br>Child has been sexually abused                                                                                                                                                                                                                                                                                                                                                                                                                                                                                                                                                                                                                                                                                                                                                                                                                |
|                             |                    |               | Life events scale    | 9v, 11v            | Dichotomous                                                   | Partner was physically cruel to child<br>Mother was physically cruel to child<br>Partner was emotionally cruel to child<br>Mother was emotionally cruel to child                                                                                                                                                                                                                                                                                                                                                                                                                                                                                                                                                                                                                                                                                                                           |

Model fit indices for the age 8 – 12 period were  $\chi^2(5) = 132.147$ ,  $p < .001$ ; CFI = .947; SRMR = 0.029; RMSEA = .051.

Table S2 Correlations among study variables

|                                                      | Severity index (8, 10y), score | Any exposure (8, 10y), yes vs no | General psychopathology factor (13y) | Internalizing factor (13y) | Internalizing factor (13y), correlated factors model | Externalizing factor (13y) | Externalizing factor (13y), correlated factors model | Sex, girl vs boy | Prenatal risk | Early-childhood risk (0-7y) | Late-childhood risk (8-12y) | IQ             |         |
|------------------------------------------------------|--------------------------------|----------------------------------|--------------------------------------|----------------------------|------------------------------------------------------|----------------------------|------------------------------------------------------|------------------|---------------|-----------------------------|-----------------------------|----------------|---------|
| Severity index (8, 10y), score                       | Pearson Correlation            | 1                                | .644**                               | -.159**                    | 0.026                                                | .096**                     | .123**                                               | -.167**          | -.065**       | .100**                      | .116**                      | .080**         | -.092** |
|                                                      | Sig. (2-tailed)                |                                  | 0.000                                | 0.000                      | 0.058                                                | 0.000                      | 0.000                                                | 0.000            | 0.000         | 0.000                       | 0.000                       | 0.000          | 0.000   |
|                                                      | N                              | 5370                             | 4613                                 | 5370                       | 5370                                                 | 5370                       | 5370                                                 | 5370             | 5125          | 5125                        | 5295                        | 4650           |         |
| Any exposure (8, 10y), yes vs no                     | Pearson Correlation            | .644**                           | 1                                    | -.148**                    | 0.018                                                | .084**                     | .116**                                               | -.159**          | -.081**       | .102**                      | .097**                      | .053**         | -.079** |
|                                                      | Sig. (2-tailed)                | 0.000                            |                                      | 0.000                      | 0.231                                                | 0.000                      | 0.000                                                | 0.000            | 0.000         | 0.000                       | 0.000                       | 0.000          | 0.000   |
|                                                      | N                              | 4613                             | 4613                                 | 4613                       | 4613                                                 | 4613                       | 4613                                                 | 4613             | 4423          | 4423                        | 4559                        | 4257           |         |
| General psychopathology factor (13y)                 | Pearson Correlation            | .159**                           | .148**                               | 1                          | -.349**                                              | .783**                     | .557**                                               | .911**           | -0.020        | .266**                      | .308**                      | .247**         | -.192** |
|                                                      | Sig. (2-tailed)                | 0.000                            | 0.000                                |                            | 0.000                                                | 0.000                      | 0.000                                                | 0.000            | 0.124         | 0.000                       | 0.000                       | 0.000          | 0.000   |
|                                                      | N                              | 5370                             | 4613                                 | 6210                       | 6210                                                 | 6210                       | 6210                                                 | 6210             | 5953          | 5953                        | 6029                        | 4675           | 0.006   |
| Internalizing factor (13y)                           | Pearson Correlation            | 0.026                            | 0.018                                | -.349**                    | 1                                                    | .844**                     | -.212**                                              | .124**           | -.197**       | .095**                      | .142**                      | .128**         | 0.006   |
|                                                      | Sig. (2-tailed)                | 0.058                            | 0.231                                | 0.000                      |                                                      | 0.000                      | 0.000                                                | 0.000            | 0.000         | 0.000                       | 0.000                       | 0.000          | 0.672   |
|                                                      | N                              | 5370                             | 4613                                 | 6210                       | 6210                                                 | 6210                       | 6210                                                 | 6210             | 5953          | 5953                        | 6029                        | 4675           |         |
| Internalizing factor (13y), correlated factors model | Pearson Correlation            | .096**                           | .084**                               | .783**                     | .844**                                               | 1                          | .148**                                               | .564**           | .133**        | .210**                      | .263**                      | .222**         | -.100** |
|                                                      | Sig. (2-tailed)                | 0.000                            | 0.000                                | 0.000                      | 0.000                                                |                            | 0.000                                                | 0.000            | 0.000         | 0.000                       | 0.000                       | 0.000          | 0.000   |
|                                                      | N                              | 5370                             | 4613                                 | 6210                       | 6210                                                 | 6210                       | 6210                                                 | 6210             | 5953          | 5953                        | 6029                        | 4675           |         |
| Externalizing factor (13y)                           | Pearson Correlation            | .123**                           | .116**                               | .557**                     | -.212**                                              | .148**                     | 1                                                    | .835**           | -.103**       | .154**                      | .178**                      | .134**         | -.163** |
|                                                      | Sig. (2-tailed)                | 0.000                            | 0.000                                | 0.000                      | 0.000                                                | 0.000                      |                                                      | 0.000            | 0.000         | 0.000                       | 0.000                       | 0.000          | 0.000   |
|                                                      | N                              | 5370                             | 4613                                 | 6210                       | 6210                                                 | 6210                       | 6210                                                 | 6210             | 5953          | 5953                        | 6029                        | 4675           |         |
| Externalizing factor (13y), correlated factors model | Pearson Correlation            | .167**                           | .159**                               | .911**                     | .124**                                               | .564**                     | .835**                                               | 1                | -.071**       | .246**                      | .285**                      | .222**         | -.206** |
|                                                      | Sig. (2-tailed)                | 0.000                            | 0.000                                | 0.000                      | 0.000                                                | 0.000                      | 0.000                                                |                  | 0.000         | 0.000                       | 0.000                       | 0.000          | 0.000   |
|                                                      | N                              | 5370                             | 4613                                 | 6210                       | 6210                                                 | 6210                       | 6210                                                 | 6210             | 5953          | 5953                        | 6029                        | 4675           |         |
| Sex                                                  | Pearson Correlation            | -.065**                          | -.081**                              | -0.020                     | .197**                                               | .133**                     | -.103**                                              | -.071**          | 1             | 0.008                       | -0.007                      | -0.007         | -0.013  |
|                                                      | Sig. (2-tailed)                | 0.000                            | 0.000                                | 0.124                      | 0.000                                                | 0.000                      | 0.000                                                | 0.000            |               | 0.538                       | 0.578                       | 0.574          | 0.388   |
|                                                      | N                              | 5370                             | 4613                                 | 6210                       | 6210                                                 | 6210                       | 6210                                                 | 6210             | 6210          | 5953                        | 5953                        | 6029           | 4675    |
| Prenatal risk                                        | Pearson Correlation            | .100**                           | .102**                               | .266**                     | .095**                                               | .210**                     | .154**                                               | .246**           | 0.008         | 1                           | .497**                      | .257**         | -.128** |
|                                                      | Sig. (2-tailed)                | 0.000                            | 0.000                                | 0.000                      | 0.000                                                | 0.000                      | 0.000                                                | 0.000            | 0.538         |                             | 0.000                       | 0.000          | 0.000   |
|                                                      | N                              | 5125                             | 4423                                 | 5953                       | 5953                                                 | 5953                       | 5953                                                 | 5953             | 5953          | 5953                        | 5953                        | 5790           | 4675    |
| Early-childhood risk (0-7y)                          | Pearson Correlation            | .116**                           | .097**                               | .308**                     | .142**                                               | .263**                     | .178**                                               | .285**           | -0.007        | .497**                      | 1                           | .507**         | -.042** |
|                                                      | Sig. (2-tailed)                | 0.000                            | 0.000                                | 0.000                      | 0.000                                                | 0.000                      | 0.000                                                | 0.000            | 0.578         | 0.000                       |                             | 0.000          | 0.004   |
|                                                      | N                              | 5125                             | 4423                                 | 5953                       | 5953                                                 | 5953                       | 5953                                                 | 5953             | 5953          | 5953                        | 5953                        | 5790           | 4675    |
| Late-childhood risk (8-12y)                          | Pearson Correlation            | .080**                           | .053**                               | .247**                     | .128**                                               | .222**                     | .134**                                               | .222**           | -0.007        | .257**                      | .507**                      | 1              | -0.014  |
|                                                      | Sig. (2-tailed)                | 0.000                            | 0.000                                | 0.000                      | 0.000                                                | 0.000                      | 0.000                                                | 0.000            | 0.574         | 0.000                       | 0.000                       |                | 0.355   |
|                                                      | N                              | 5295                             | 4559                                 | 6029                       | 6029                                                 | 6029                       | 6029                                                 | 6029             | 6029          | 5790                        | 5790                        | 6029           | 4632    |
| IQ                                                   | Pearson Correlation            | -.092**                          | -.079**                              | -.192**                    | 0.006                                                | -.100**                    | -.163**                                              | -.206**          | -0.013        | -.128**                     | -.042**                     | -0.014         | 1       |
|                                                      | Sig. (2-tailed)                | 0.000                            | 0.000                                | 0.000                      | 0.672                                                | 0.000                      | 0.000                                                | 0.000            | 0.388         | 0.004                       | 0.355                       |                |         |
|                                                      | N                              | 4650                             | 4257                                 | 4675                       | 4675                                                 | 4675                       | 4675                                                 | 4675             | 4675          | 4675                        | 4675                        | 4632           | 4675    |
| Mean (SD) or %                                       | 4.58 (4.94)                    | 53                               | 0.05 (0.64)                          | 0.01 (0.65)                | 0.04 (0.74)                                          | 0.04 (0.60)                | 0.06 (0.76)                                          | 51               | -0.07 (0.74)  | 0.32 (0.83)                 | 0.06 (0.82)                 | 105.61 (16.34) |         |

\*\* Correlation is significant at the 0.01 level (2-tailed).

Figure S1 Three different models of psychopathology

Model A: Correlated factors

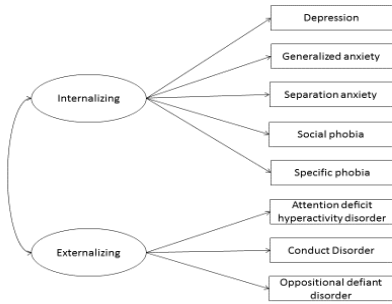

Model B: Bifactor

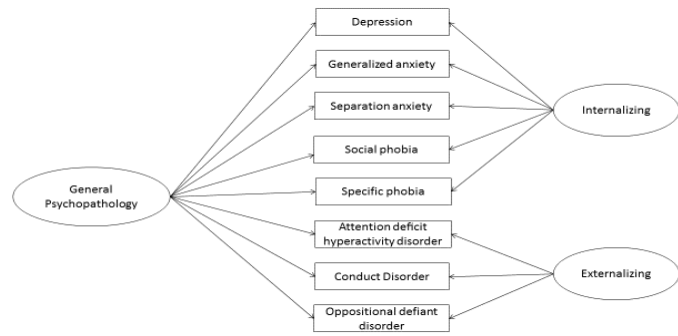

Model C: One factor

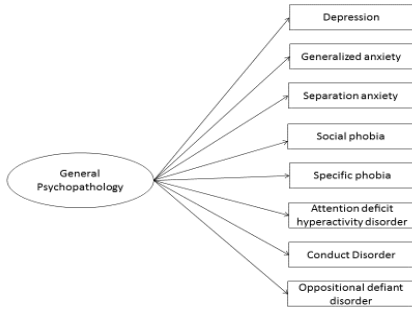

**Table S3.1** The structure of psychopathology at age 13 (N = 6,210): Model fit statistics, loadings, and correlations of thee different models

| Statistics, loadings, and correlations   | Correlated factors model (A) |               |               | Bifactor model (B) |         |               | 1-factor model (C) |           |         |
|------------------------------------------|------------------------------|---------------|---------------|--------------------|---------|---------------|--------------------|-----------|---------|
|                                          | Model fit                    | Externalizing | Internalizing | Model fit          | General | Externalizing | Internalizing      | Model fit | General |
| <b>Statistics</b>                        |                              |               |               |                    |         |               |                    |           |         |
| Comparative fit index                    | 0.962                        |               |               | 0.992              |         |               |                    | 0.764     |         |
| Root-mean-square error of approximation  | 0.055                        |               |               | 0.032              |         |               |                    | 0.136     |         |
| Standardized Root Mean Square Residual   | 0.047                        |               |               | 0.020              |         |               |                    | 0.116     |         |
| <b>Standardized factor loadings</b>      |                              |               |               |                    |         |               |                    |           |         |
| Attention deficit hyperactivity disorder |                              | 0.785         |               |                    | 0.656   | 0.388         |                    |           | 0.732   |
| Conduct disorder                         |                              | 0.676         |               |                    | 0.486   | 0.446         |                    |           | 0.607   |
| Oppositional defiant disorder            |                              | 0.778         |               |                    | 0.518   | 0.686         |                    |           | 0.685   |
| Major depressive disorder                |                              |               | 0.658         |                    | 0.517   |               | 0.350              |           | 0.541   |
| Generalized anxiety disorder             |                              |               | 0.665         |                    | 0.318   |               | 0.698              |           | 0.471   |
| Separation anxiety                       |                              |               | 0.690         |                    | 0.427   |               | 0.514              |           | 0.564   |
| Social phobia                            |                              |               | 0.521         |                    | 0.322   |               | 0.391              |           | 0.42    |
| Specific phobia                          |                              |               | 0.376         |                    | 0.110   |               | 0.446              |           | 0.259   |
| Factor correlation                       |                              |               | 0.437         |                    |         |               |                    |           |         |

**Table S3.2** The structure of psychopathology at age 7 (N = 7,814): Model fit statistics, loadings, and correlations of the different models

| Statistics, loadings, and correlations   | Correlated factors model (A) |               |               | Bifactor model (B) |         |               |               | 1-factor model (C) |         |
|------------------------------------------|------------------------------|---------------|---------------|--------------------|---------|---------------|---------------|--------------------|---------|
|                                          | Model fit                    | Externalizing | Internalizing | Model fit          | General | Externalizing | Internalizing | Model fit          | General |
| <b>Statistics</b>                        |                              |               |               |                    |         |               |               |                    |         |
| Comparative fit index                    | 0.985                        |               |               | 0.998              |         |               |               | 0.793              |         |
| Root-mean-square error of approximation  | 0.038                        |               |               | 0.019              |         |               |               | 0.139              |         |
| Standardized Root Mean Square Residual   | 0.031                        |               |               | 0.012              |         |               |               | 0.109              |         |
| <b>Standardized factor loadings</b>      |                              |               |               |                    |         |               |               |                    |         |
| Attention deficit hyperactivity disorder |                              | 0.781         |               |                    | 0.589   | 0.466         |               |                    | 0.731   |
| Conduct disorder                         |                              | 0.588         |               |                    | 0.420   | 0.396         |               |                    | 0.537   |
| Oppositional defiant disorder            |                              | 0.753         |               |                    | 0.477   | 0.663         |               |                    | 0.682   |
| Major depressive disorder                |                              |               | 0.664         |                    | 0.486   |               | 0.383         |                    | 0.521   |
| Generalized anxiety disorder             |                              |               | 0.673         |                    | 0.337   |               | 0.743         |                    | 0.464   |
| Separation anxiety                       |                              |               | 0.620         |                    | 0.434   |               | 0.396         |                    | 0.484   |
| Social phobia                            |                              |               | 0.475         |                    | 0.271   |               | 0.385         |                    | 0.353   |
| Factor correlation                       |                              |               | 0.432         |                    |         |               |               |                    |         |

**Table S3.3** The structure of psychopathology at age 10 (N = 7,145): Model fit statistics, loadings, and correlations of thee different models

| Statistics, loadings, and correlations   | Correlated factors model (A) |               |               | Bifactor model (B) |         |               |               | 1-factor model (C) |         |
|------------------------------------------|------------------------------|---------------|---------------|--------------------|---------|---------------|---------------|--------------------|---------|
|                                          | Model fit                    | Externalizing | Internalizing | Model fit          | General | Externalizing | Internalizing | Model fit          | General |
| <b>Statistics</b>                        |                              |               |               |                    |         |               |               |                    |         |
| Comparative fit index                    | 0.976                        |               |               | 0.993              |         |               |               | 0.793              |         |
| Root-mean-square error of approximation  | 0.044                        |               |               | 0.030              |         |               |               | 0.127              |         |
| Standardized Root Mean Square Residual   | 0.039                        |               |               | 0.019              |         |               |               | 0.104              |         |
| <b>Standardized factor loadings</b>      |                              |               |               |                    |         |               |               |                    |         |
| Attention deficit hyperactivity disorder |                              | 0.781         |               |                    | 0.465   | 0.583         |               |                    | 0.721   |
| Conduct disorder                         |                              | 0.626         |               |                    | 0.343   | 0.516         |               |                    | 0.564   |
| Oppositional defiant disorder            |                              | 0.778         |               |                    | 0.396   | 0.725         |               |                    | 0.689   |
| Major depressive disorder                |                              |               | 0.609         |                    | 0.622   |               | 0.127         |                    | 0.514   |
| Generalized anxiety disorder             |                              |               | 0.699         |                    | 0.569   |               | 0.395         |                    | 0.519   |
| Separation anxiety                       |                              |               | 0.663         |                    | 0.520   |               | 0.420         |                    | 0.545   |
| Social phobia                            |                              |               | 0.457         |                    | 0.434   |               | 0.146         |                    | 0.386   |
| Specific phobia                          |                              |               | 0.426         |                    | 0.211   |               | 0.609         |                    | 0.316   |
| Factor correlation                       |                              |               | 0.459         |                    |         |               |               |                    |         |



**Table S3.4** Bifactor-specific model fit indices

General psychopathology, age 13

|                    | g    | EXT  | INT  | Unique |
|--------------------|------|------|------|--------|
| Total variance     | ,200 | ,103 | ,153 | ,544   |
| Common Var. (ECV)  | ,439 | ,225 | ,336 |        |
| Omega              | ,816 | ,803 | ,735 |        |
| Omega(h)           | ,475 | ,366 | ,491 |        |
| Relative Omega     | ,582 | ,456 | ,667 |        |
| Factor correlation | ,689 | ,605 | ,700 |        |
| H                  | ,693 | ,568 | ,652 |        |
| PUC                | ,536 |      |      |        |

General psychopathology, age 7

|                    | g    | EXT  | INT  | Unique |
|--------------------|------|------|------|--------|
| Total variance     | .195 | .116 | .143 | .546   |
| Common Var. (ECV)  | .428 | .256 | .316 |        |
| Omega              | .798 | .760 | .715 |        |
| Omega(h)           | .481 | .390 | .435 |        |
| Relative Omega     | .604 | .513 | .609 |        |
| Factor correlation | .694 | .624 | .660 |        |
| H                  | .641 | .555 | .638 |        |
| PUC                | .571 |      |      |        |

General psychopathology, age 10

|                    | g    | EXT  | INT  | Unique |
|--------------------|------|------|------|--------|
| Total variance     | ,213 | ,141 | ,093 | ,553   |
| Common Var. (ECV)  | ,477 | ,316 | ,207 |        |
| Omega              | ,810 | ,776 | ,735 |        |
| Omega(h)           | ,544 | ,541 | ,251 |        |
| Relative Omega     | ,671 | ,697 | ,342 |        |
| Factor correlation | ,737 | ,735 | ,501 |        |
| H                  | ,702 | ,665 | ,507 |        |
| PUC                | ,536 |      |      |        |



**Table S4.** Associations between exposure to bullying and internalizing or externalizing factors in a correlated factors model

| Bullying exposure                                       | Model A        |                | Model B        |                | Model C       |                |
|---------------------------------------------------------|----------------|----------------|----------------|----------------|---------------|----------------|
|                                                         | INT<br>β (SE)  | EXT<br>β (SE)  | INT<br>β (SE)  | EXT<br>β (SE)  | INT<br>β (SE) | EXT<br>β (SE)  |
| Severity index ( <i>n</i> = 5,370) <sup>a</sup> , score | 0.08 (0.01)*** | 0.13 (0.01)*** | 0.06 (0.01)*** | 0.06 (0.01)*** | 0.01 (0.01)   | 0.09 (0.01)*** |
| Any exposure ( <i>n</i> = 4,613), yes vs no             | 0.07 (0.01)*** | 0.13 (0.01)*** | 0.05 (0.01)*** | 0.06 (0.01)*** | 0.00 (0.01)   | 0.09 (0.01)*** |
| Chronicity ( <i>n</i> = 4,613)                          |                |                |                |                |               |                |
| none (reference)                                        |                |                |                |                |               |                |
| unstable                                                | 0.06 (0.02)*** | 0.10 (0.02)*** | 0.04 (0.01)**  | 0.04 (0.01)**  | 0.01 (0.01)   | 0.07 (0.01)*** |
| stable                                                  | 0.06 (0.02)*** | 0.13 (0.02)*** | 0.04 (0.02)**  | 0.07 (0.02)*** | -0.01 (0.01)  | 0.10 (0.01)*** |
| Type ( <i>n</i> = 4,882) <sup>b</sup>                   |                |                |                |                |               |                |
| none (reference)                                        |                |                |                |                |               |                |
| overt only                                              | 0.05 (0.01)**  | 0.10 (0.02)*** | 0.03 (0.01)**  | 0.05 (0.01)*** | -0.01 (0.01)  | 0.07 (0.01)*** |
| relational only                                         | 0.03 (0.02)*   | 0.04 (0.01)**  | 0.02 (0.01)    | 0.03 (0.01)*   | 0.01 (0.01)   | 0.02 (0.01)    |
| both                                                    | 0.05 (0.01)*** | 0.09 (0.02)**  | 0.04 (0.01)**  | 0.05 (0.01)*** | 0.00 (0.01)   | 0.06 (0.01)*** |

Note: Model A presents linear regression results controlling for sex and early-life environmental risk exposure; Model B is similar to model A, additionally controlling for pre-existing psychopathology (GP, INT, or EXT); Model C is similar to model A, additionally controlling the internalizing factor for the externalizing factor and vice versa.

<sup>a</sup> Summed across time points (age 8 and 10 years).

<sup>b</sup> Measured at age 10

\**p*<0.05; \*\**p*<0.01; \*\*\**p*<0.001

INT = internalizing factor; EXT = externalizing factor

**Table S5.** Associations between exposure to bullying and internalizing or externalizing factors in non-imputed data

|                                                     | Model A: bifactor model |              |                | Model A: correlated factors model |                 |
|-----------------------------------------------------|-------------------------|--------------|----------------|-----------------------------------|-----------------|
|                                                     | GPF                     | INT          | EXT            | INT                               | EXT             |
| Bullying exposure                                   | $\beta$ (SE)            | $\beta$ (SE) | $\beta$ (SE)   | $\beta$ (SE)                      | $\beta$ (SE)    |
| Severity index ( $n = 5,125$ ) <sup>a</sup> , score | 0.13 (0.01)***          | 0.02 (0.01)  | 0.10 (0.01)*** | 0.07 (0.01)***                    | 0.013 (0.01)*** |

Note: Model A presents linear regression results controlling for sex and early-life environmental risk exposure.

<sup>a</sup> Summed across time points (age 8 and 10 years).

\* $p < 0.05$ ; \*\* $p < 0.01$ ; \*\*\* $p < 0.001$

INT = internalizing factor; EXT = externalizing factor

**Table S6.** Associations between exposure to bullying and general or specific factors of psychopathology

|                                                 | Minimally adjusted model |               |                | Fully adjusted model |              |                |
|-------------------------------------------------|--------------------------|---------------|----------------|----------------------|--------------|----------------|
|                                                 | GP                       | INT           | EXT            | GP                   | INT          | EXT            |
| Bullying exposure                               | $\beta$ (SE)             | $\beta$ (SE)  | $\beta$ (SE)   | $\beta$ (SE)         | $\beta$ (SE) | $\beta$ (SE)   |
| Severity index (n = 5,370) <sup>a</sup> , score | 0.16 (0.01)***           | 0.04 (0.01)** | 0.12 (0.01)*** | 0.06 (0.01)***       | 0.03 (0.01)* | 0.04 (0.01)**  |
| Any exposure (n = 4,613), yes vs no             | 0.15 (0.01)***           | 0.03 (0.01)*  | 0.11 (0.01)*** | 0.05 (0.01)***       | 0.02 (0.01)  | 0.04 (0.01)**  |
| Chronicity (n = 4,613)                          |                          |               |                |                      |              |                |
| none (reference)                                |                          |               |                |                      |              |                |
| unstable                                        | 0.12 (0.02)***           | 0.04 (0.02)*  | 0.09 (0.02)*** | 0.04 (0.01)**        | 0.03 (0.01)* | 0.02 (0.01)    |
| stable                                          | 0.15 (0.02)***           | 0.01 (0.02)   | 0.12 (0.02)*** | 0.06 (0.01)***       | 0.00 (0.02)  | 0.05 (0.02)*** |
| Type (n = 4,882) <sup>b</sup>                   |                          |               |                |                      |              |                |
| none (reference)                                |                          |               |                |                      |              |                |
| overt only                                      | 0.11 (0.02)***           | 0.01 (0.01)   | 0.08 (0.02)*** | 0.05 (0.01)***       | 0.00 (0.01)  | 0.04 (0.01)*   |
| relational only                                 | 0.04 (0.02)**            | 0.02 (0.02)   | 0.03 (0.02)    | 0.02 (0.01)          | 0.01 (0.02)  | 0.02 (0.01)    |
| both                                            | 0.10 (0.02)***           | 0.02 (0.01)   | 0.07 (0.02)*** | 0.05 (0.01)***       | 0.02 (0.01)  | 0.03 (0.01)*   |
| Status (n = 4,909) <sup>b</sup>                 |                          |               |                |                      |              |                |
| none (reference)                                |                          |               |                |                      |              |                |
| pure victim                                     | 0.11 (0.02)***           | 0.02 (0.01)   | 0.07 (0.01)*** | 0.06 (0.01)***       | 0.02 (0.01)  | 0.03 (0.01)*   |
| pure bully                                      | 0.04 (0.01)**            | 0.02 (0.01)   | 0.02 (0.02)    | 0.03 (0.01)*         | 0.02 (0.01)  | 0.01 (0.02)    |
| victim/bully                                    | 0.12 (0.02)***           | 0.02 (0.02)   | 0.10 (0.02)*** | 0.05 (0.01)***       | 0.01 (0.02)  | 0.05 (0.02)**  |

Note: Model A presents linear regression results controlling for sex; Model B is similar to model A, additionally controlling for early-life environmental risk exposure, pre-existing psychopathology (GP, INT, or EXT), and IQ.

<sup>a</sup> Summed across time points (age 8 and 10 years).

<sup>b</sup> Measured at age 10

\* $p < 0.05$ ; \*\* $p < 0.01$ ; \*\*\* $p < 0.001$

GP = general psychopathology factor; INT = specific internalizing factor; EXT = specific externalizing factor
