# Supplementary material for: Exposure to Bullying and General Psychopathology: A Prospective, Longitudinal Study
Source: Res Child Adolesc Psychopathol. 2021 Jan 22;49(6):727–36. doi: 10.1007/s10802-020-00760-2 (PMC8096758; doi:10.1007/s10802-020-00760-2)
Supplement: Supplementary file 2 — Supplementary file2 (XLSX 108 KB) [file 10802_2020_760_MOESM2_ESM.xlsx]

## Sheet: Table S1.1 Risk_prenatal
	S1.1 Environmental risk exposure items - Prenatal period
		Valid Range	M (SD)	Scale	Time Points	Measurement Unit	Items
	Life events	0-11	2.33 (1.72)	Life events scale	18w gestation	Dichotomous	Your partner died	You lost your job
							One of your children died	You moved house
							A friend or relative died	You were bleeding and thought you might miscarry
							One of your children was ill	You started a new job
							Your partner was ill	You had a test to see if your baby was abnormal
							A friend or relative was ill	Result on a test that suggested your baby might not be normal
							You were admitted to hospital	You were told that you were going to have twins
							You were very ill	You heard something that happened might be harmful to the baby
							Your partner lost his job	You took an examination
							Your partner had problems at work	Your house or car was burgled
							You had problems at work	You had an accident
	Contextual Risks	0-5	0.55 (0.87)	Life events scale	18w gestation	Dichotomous	You had a major financial problem
							You became homeless
							Your income was reduced
				Family adversity index	Pregnancy composite	Dichotomous	Housing adequacy
							Housing Basic Living
							Housing Defects
							Financial difficulties
	Parental Risks	0-9	0.49 (0.79)	Life events scale	18w gestation	Dichotomous	You were in trouble with the law
							Your partner was in trouble with the law
							You were convicted of an offence
							You attempted suicide
							You tried to have an abortion
				Family adversity index	Pregnancy composite	Dichotomous	Early parenthood
							Maternal education
							Psychopathology of mother
							Substance abuse
							Crime trouble with police
							Crime convictions
	Interpersonal Risks	0-13	1.18 (1.51)	Life events scale	18w gestation	Dichotomous	You found that your partner didn't want your child	Your partner was emotionally cruel to your children
							You argued with your partner	You were divorced
							You had arguments with your family or friends	Your partner went away
							Your partner hurt you physically	You and your partner separated
							Your partner hurt your children physically
							Your partner was emotionally cruel to you
				Family adversity index	Pregnancy composite	Dichotomous	Partner Status	Family Major problems
							Partner Affection	Partner Support
							Partner cruelty	Social Network - Emotional
							Family Size	Social Network - Practical
	Model fit indices for the prenatal period were χ2(2) = 163.581, p < .001; CFI = .958; SRMR = 0.026 ; RMSEA = .075.

## Sheet: Table S1.2 Risk_0-7
	S1.2 Environmental risk items - Early Childhood (birth - age 7)
		Valid Range	M (SD)	Scale	Time points	Measurement unit	Items
	Life Events	0-83	27.51 (11.96)	Life events scale	8wk, 8m, 21m	Dichotomous	Your partner died	You lost your job
					3y, 4y, 5y, 6y		One of your children died	You moved house
							A friend or relative died	You were bleeding and thought you might miscarry
							One of your children was ill	You started a new job
							Your partner was ill	You had a test to see if your baby was abnormal
							A friend or relative was ill	Result on a test that suggested your baby might not be normal
							You were admitted to hospital	You were told that you were going to have twins
							You were very ill	You heard something that happened might be harmful to the baby
							Your partner lost his job	You took an examination
							Your partner had problems at work	Your house or car was burgled
							You had problems at work	You had an accident
								You became pregnant
								You returned to work
								Your partner started a new job
								Your pet died
				Life events - child	18m, 30m,	Dichotomous	Child has been taken into care	Child has had a new mother or father
					3y, 4y, 5y, 6y		Child's pet died	Child has had a new brother or sister
							Child moved home	Child has been admitted to hospital
							Child had shock or fright	Child has changed their caretaker
							Child has had someone in family die	Child has been separated from someone else
							Child has been separated from mother	Child has started a new school
							Child has been separated from father	Child has lost their best friend
								Child started school
	Contextual Risks	0-20	3.53 (3.05)	Life events scale	8wk, 8m, 21m	Dichotomous	You had a major financial problem
					3y, 4y, 5y, 6y		You became homeless
							Your income was reduced
				Family adversity index	0-2y composite	Dichotomous	Housing adequacy
					2-4y composite		Housing Basic Living
							Housing Defects
							Financial difficulties
	Parental Risks	0-23	1.21 (1.75)	Life events scale	8wk, 8m, 21m	Dichotomous	You were in trouble with the law
					3y, 4y, 5y, 6y		Your partner was in trouble with the law
							You were convicted of an offence
							You attempted suicide
							You tried to have an abortoin
				Family adversity index	0-2y composite	Dichotomous	Early parenthood
					2-4y composite		Maternal education
							Psychopathology of mother
							Substance abuse
							Crime trouble with police
							Crime convictions
	Interpersonal Risks	0-47	11.82 (7.52)	Life events scale	8wk, 8m, 21m	Dichotomous	You found that your partner didn't want your child	Your partner was emotionally cruel to you
					3y, 4y, 5y, 6y		You argued with your partner	You were divorced
							You had arguments with your family or friends	Your partner went away
							Your partner hurt you physically	You and your partner separated
				Family adversity index	0-2y composite	Dichotomous	Partner Status	Family major problems
					2-4y composite		Partner Affection	Low partner support
							Partner cruelty	Low social network, emotional
							Family Size	Low social network, practical
				Partner realtionship	21m, 33m, 6y	Nominal	Shouted in anger in past 3 months
						Collapsed	Hit or slapped in past 3 months
						0 = No	Threw something in anger in past 3 mths
						1 = Yes, mom or/and partner
				Harsh Parenting	18m, 2y, 3y	Ordinal, coding system	Shout during tantrums/when naughty
					4y, 6y	differed across time points
						Summed scores and	Smack during tantrums/when naugthy
						performed median split
	Direct victimization	0-17	0.45 (1.24)	Life events - child	18m, 30m,	Dichotomous	Child has been physically hurt by someone
					3y, 4y, 5y, 6y		Child has been sexually abused
				Life events scale	8wk, 8m, 21m	Dichotomous	Partner was physically cruel to child
					3y, 4y, 5y, 6y		Mother was physcially cruel to child
							Partner was emotionally cruel to child
							Mother was emotionally cruel to child
	χ2(5) = 708.866, p < .001; CFI = .921; SRMR = 0.039; RMSEA = .099.

## Sheet: Table S1.3 Risk_8-12
	S1.3 Environmental risk items - Mid Childhood (age 8 - 12)
		Valid Range	M (SD)	Scale	Time points	Measurement unit	Items
	Life Events	0-30	7.27 (4.50)	Life events scale	9 y, 11 y	Dichotomous	Your partner died	You lost your job
							One of your children died	You moved house
							A friend or relative died	You were bleeding and thought you might miscarry
							One of your children was ill	You started a new job
							Your partner was ill	You had a test to see if your baby was abnormal
							A friend or relative was ill	Result on a test that suggested your baby might not be normal
							You were admitted to hospital	You were told that you were going to have twins
							You were very ill	You heard something that happened might be harmful to the baby
							Your partner lost his job	You took an examination
							Your partner had problems at work	Your house or car was burgled
							You had problems at work	You had an accident
								You returned to work
								One of your children started school
								Your partner started a new job
								Your pet died
				Life events - child	9y	Dichotomous	Child has been taken into care	Child has had a new mother or father
							Child's pet died	Child has had a new brother or sister
							Child moved home	Child has been admitted to hospital
							Child had shock or fright	Child has changed their caretaker
							Child has had someone in family die	Child has been separated from someone else
							Child has been separated from mother	Child has started a new school
							Child has been separated from father	Child has lost their best friend
	Contextual Risks	0-6	0.50 (0.82)	Life events scale	9y , 11y	Dichotomous	You had a major financial problem
							You became homeless
							Your income was reduced
	Parental Risks	0-4	0.06 (0.29)	Life events scale	9y, 11y	Dichotomous	You were in trouble with the law
							Your partner was in trouble with the law
							You were convicted of an offence
							You attempted suicide
							You tried to have an abortoin
	Interpersonal Risks	0-15	2.05 (2.09)	Life events scale	9y, 11y	Dichotomous	You found that your partner didn't want your child	Your partner was emotionally cruel to you
							You argued with your partner	You were divorced
							You had arguments with your family or friends	Your partner went away
							Your partner hurt you physically	You and your partner separated
				Partner realtionship	9y	Nominal	Shouted in anger in past 3 months
						Collapsed	Hit or slapped in past 3 months
						0 = No	Threw something in anger in past 3 mths
						1 = Yes, mom or/and partner
				Harsh Parenting	9y	Ordinal,	Child slapped/hit
						Collapsed
						0 = Never
						1 = Rarely - every day
	Direct victimization	0-7	0.10 (0.41)	Life events - child	9y	Dichotomous	Child has been physically hurt by someone
							Child has been sexually abused
				Life events scale	9y, 11y	Dichotomous	Partner was physically cruel to child
							Mother was physcially cruel to child
							Partner was emotionally cruel to child
							Mother was emotionally cruel to child
	Model fit indices for the age 8 – 12 period were χ2(5) = 132.147, p < .001; CFI = .947; SRMR = 0.029 ; RMSEA = .051.

## Sheet: TS2.Correlations_Descriptives
Table S2 Correlations among study variables
		Severity index (8, 10y), score	Any exposure (8, 10y), yes vs no	General psychopathology factor (13y)	Internalizing factor (13y)	Internalizing factor (13y), correlated factors model	Externalizing factor (13y)	Externalizing factor (13y), correlated factors model	Sex. girl vs boy	Prenatal risk	Early-childhood risk (0-7y)	Late-childhood risk (8-12y)	IQ
Severity index (8, 10y), score	Pearson Correlation	1	.644**	.159**	0.0258856	.096**	.123**	.167**	-.065**	.100**	.116**	.080**	-.092**
	Sig. (2-tailed)		0	1.48842e-31	0.0578567	1.99356e-12	1.27775e-19	7.32993e-35	1.84921e-06	7.09529e-13	6.27177e-17	4.50189e-09	2.75703e-10
	N	5370	4613	5370	5370	5370	5370	5370	5370	5125	5125	5295	4650
Any exposure (8, 10y), yes vs no	Pearson Correlation	.644**	1	.148**	0.017654	.084**	.116**	.159**	-.081**	.102**	.097**	.053**	-.079**
	Sig. (2-tailed)	0		3.90788e-24	0.230602	9.49249e-09	2.155e-15	1.22319e-27	3.16812e-08	8.44733e-12	1.09672e-10	0.000335613	2.50197e-07
	N	4613	4613	4613	4613	4613	4613	4613	4613	4423	4423	4559	4257
General psychopathology factor (13y)	Pearson Correlation	.159**	.148**	1	.349**	.783**	.557**	.911**	-0.0195273	.266**	.308**	.247**	-.192**
	Sig. (2-tailed)	1.48842e-31	3.90788e-24		1.2868e-177	0	0	0	0.123887	3.0288e-97	3.12019e-131	8.43105e-85	5.17174e-40
	N	5370	4613	6210	6210	6210	6210	6210	6210	5953	5953	6029	4675
Internalizing factor (13y)	Pearson Correlation	0.0258856	0.017654	.349**	1	.844**	-.212**	.124**	.197**	.095**	.142**	.128**	0.00618761
	Sig. (2-tailed)	0.0578567	0.230602	1.2868e-177		0	3.19262e-64	9.04509e-23	1.23704e-55	2.56543e-13	2.38044e-28	1.60437e-23	0.672323
	N	5370	4613	6210	6210	6210	6210	6210	6210	5953	5953	6029	4675
Internalizing factor (13y), correlated factors model	Pearson Correlation	.096**	.084**	.783**	.844**	1	.148**	.564**	.133**	.210**	.263**	.222**	-.100**
	Sig. (2-tailed)	1.99356e-12	9.49249e-09	0	0		7.97205e-32	0	6.63556e-26	2.64113e-60	6.12002e-95	3.15399e-68	8.3354e-12
	N	5370	4613	6210	6210	6210	6210	6210	6210	5953	5953	6029	4675
Externalizing factor (13y)	Pearson Correlation	.123**	.116**	.557**	-.212**	.148**	1	.835**	-.103**	.154**	.178**	.134**	-.163**
	Sig. (2-tailed)	1.27775e-19	2.155e-15	0	3.19262e-64	7.97205e-32		0	3.1632e-16	6.60931e-33	1.31705e-43	1.85823e-25	4.61121e-29
	N	5370	4613	6210	6210	6210	6210	6210	6210	5953	5953	6029	4675
Externalizing factor (13y), correlated factors model	Pearson Correlation	.167**	.159**	.911**	.124**	.564**	.835**	1	-.071**	.246**	.285**	.222**	-.206**
	Sig. (2-tailed)	7.32993e-35	1.22319e-27	0	9.04509e-23	0	0		1.92282e-08	1.15556e-82	1.98861e-111	2.23003e-68	6.76935e-46
	N	5370	4613	6210	6210	6210	6210	6210	6210	5953	5953	6029	4675
Sex	Pearson Correlation	-.065**	-.081**	-0.0195273	.197**	.133**	-.103**	-.071**	1	0.00798503	-0.00721914	-0.00724286	-0.0126385
	Sig. (2-tailed)	1.84921e-06	3.16812e-08	0.123887	1.23704e-55	6.63556e-26	3.1632e-16	1.92282e-08		0.537914	0.577604	0.573929	0.387615
	N	5370	4613	6210	6210	6210	6210	6210	6210	5953	5953	6029	4675
Prenatal risk	Pearson Correlation	.100**	.102**	.266**	.095**	.210**	.154**	.246**	0.00798503	1	.497**	.257**	-.128**
	Sig. (2-tailed)	7.09529e-13	8.44733e-12	3.0288e-97	2.56543e-13	2.64113e-60	6.60931e-33	1.15556e-82	0.537914		0	1.01438e-87	1.15765e-18
	N	5125	4423	5953	5953	5953	5953	5953	5953	5953	5953	5790	4675
Early-childhood risk (0-7y)	Pearson Correlation	.116**	.097**	.308**	.142**	.263**	.178**	.285**	-0.00721914	.497**	1	.507**	-.042**
	Sig. (2-tailed)	6.27177e-17	1.09672e-10	3.12019e-131	2.38044e-28	6.12002e-95	1.31705e-43	1.98861e-111	0.577604	0		0	0.00423064
	N	5125	4423	5953	5953	5953	5953	5953	5953	5953	5953	5790	4675
Late-childhood risk (8-12y)	Pearson Correlation	.080**	.053**	.247**	.128**	.222**	.134**	.222**	-0.00724286	.257**	.507**	1	-0.0136015
	Sig. (2-tailed)	4.50189e-09	0.000335613	8.43105e-85	1.60437e-23	3.15399e-68	1.85823e-25	2.23003e-68	0.573929	1.01438e-87	0		0.35471
	N	5295	4559	6029	6029	6029	6029	6029	6029	5790	5790	6029	4632
IQ	Pearson Correlation	-.092**	-.079**	-.192**	0.00618761	-.100**	-.163**	-.206**	-0.0126385	-.128**	-.042**	-0.0136015	1
	Sig. (2-tailed)	2.75703e-10	2.50197e-07	5.17174e-40	0.672323	8.3354e-12	4.61121e-29	6.76935e-46	0.387615	1.15765e-18	0.00423064	0.35471
	N	4650	4257	4675	4675	4675	4675	4675	4675	4675	4675	4632	4675
Mean (SD) or %		4.58 (4.94)	53.4	0.05 (0.64)	0.01 (0.65)	0.04 (0.74)	0.04 (0.60)	0.06 (0.76)	50.6	-0.07 (0.74)	0.32 (0.83)	0.06 (0.82)	105.61 (16.34)
**. Correlation is significant at the 0.01 level (2-tailed).

## Sheet: Fig S1_3 models
Figure S1 Three different models of psychopathology
Model A: Correlated factors						Model B: Bifactor
Model C: One factor

## Sheet: Table S3.1 3 models_age 13
Table S3.1 The structure of psychpathology at age 13 (N = 6,210): Model fit statistics, loadings, and correlations of thee different models
	Correlated factors model (A)				Bifactor model (B)					1-factor model (C )
Statstics, loadings, and correlations	Model fit	Externalizing	Internalizing		Model fit	General	Externalizing	Internalizing		Model fit	General
Statistics
Comparative fit index	0.962				0.992					0.764
Root-mean-square error of approximation	0.055				0.032					0.136
Standardized Root Mean Square Residual	0.047				0.020					0.116
Standardized factor loadings
Attention deficit hyperactivity disorder		0.785				0.656	0.388				0.732
Conduct disorder		0.676				0.486	0.446				0.607
Oppositional defiant disorder		0.778				0.518	0.686				0.685
Major depresive disorder			0.658			0.517		0.350			0.541
Generalized anxiety disorder			0.665			0.318		0.698			0.471
Separation anxiety			0.690			0.427		0.514			0.564
Social phobia			0.521			0.322		0.391			0.42
Specific phobia			0.376			0.110		0.446			0.259
Factor correlation			0.437

## Sheet: Table S3.2 3 models_age 7
Table S3.2 The structure of psychpathology at age 7 (N = 7,814): Model fit statistics, loadings, and correlations of thee different models
	Correlated factors model (A)				Bifactor model (B)					1-factor model (C )
Statstics, loadings, and correlations	Model fit	Externalizing	Internalizing		Model fit	General	Externalizing	Internalizing		Model fit	General
Statistics
Comparative fit index	0.985				0.998					0.793
Root-mean-square error of approximation	0.038				0.019					0.139
Standardized Root Mean Square Residual	0.031				0.012					0.109
Standardized factor loadings
Attention deficit hyperactivity disorder		0.781				0.589	0.466				0.731
Conduct disorder		0.588				0.420	0.396				0.537
Oppositional defiant disorder		0.753				0.477	0.663				0.682
Major depresive disorder			0.664			0.486		0.383			0.521
Generalized anxiety disorder			0.673			0.337		0.743			0.464
Separation anxiety			0.620			0.434		0.396			0.484
Social phobia			0.475			0.271		0.385			0.353
Factor correlation			0.432

## Sheet: Table S3.3 3 models_age 10
Table S3.3 The structure of psychpathology at age 10 (N = 7,145): Model fit statistics, loadings, and correlations of thee different models
	Correlated factors model (A)				Bifactor model (B)					1-factor model (C )
Statstics, loadings, and correlations	Model fit	Externalizing	Internalizing		Model fit	General	Externalizing	Internalizing		Model fit	General
Statistics
Comparative fit index	0.976				0.993					0.793
Root-mean-square error of approximation	0.044				0.030					0.127
Standardized Root Mean Square Residual	0.039				0.019					0.104
Standardized factor loadings
Attention deficit hyperactivity disorder		0.781				0.465	0.583				0.721
Conduct disorder		0.626				0.343	0.516				0.564
Oppositional defiant disorder		0.778				0.396	0.725				0.689
Major depresive disorder			0.609			0.622		0.127			0.514
Generalized anxiety disorder			0.699			0.569		0.395			0.519
Separation anxiety			0.663			0.520		0.420			0.545
Social phobia			0.457			0.434		0.146			0.386
Specific phobia			0.426			0.211		0.609			0.316
Factor correlation			0.459

## Sheet: Table S3.4 Bifactor fit indices
	Table S3.4 Bifactor-specific model fit indices
	General psychopathology, age 13
	======================================================
	g EXT INT Unique
	======================================================
	Total variance ,200 ,103 ,153 ,544
	Common Var. (ECV) ,439 ,225 ,336
	Omega ,816 ,803 ,735
	Omega(h) ,475 ,366 ,491
	Relative Omega ,582 ,456 ,667
	Factor correlation ,689 ,605 ,700
	H ,693 ,568 ,652
	PUC ,536
	======================================================
	General psychopathology, age 7
	======================================================
	g EXT INT Unique
	======================================================
	Total variance .195 .116 .143 .546
	Common Var. (ECV) .428 .256 .316
	Omega .798 .760 .715
	Omega(h) .481 .390 .435
	Relative Omega .604 .513 .609
	Factor correlation .694 .624 .660
	H .641 .555 .638
	PUC .571
	======================================================
	General psychopathology, age 10
	======================================================
	g EXT INT Unique
	======================================================
	Total variance ,213 ,141 ,093 ,553
	Common Var. (ECV) ,477 ,316 ,207
	Omega ,810 ,776 ,735
	Omega(h) ,544 ,541 ,251
	Relative Omega ,671 ,697 ,342
	Factor correlation ,737 ,735 ,501
	H ,702 ,665 ,507
	PUC ,536
	======================================================

## Sheet: TS4.Regression_corrfm
Table S4. Associations between exposure to bullying and interalizing or externalizing factors in a correlated factors model
	Model A			Model B			Model C
	INT	EXT		INT	EXT		INT	EXT
Bullying exposure	β (SE)	β (SE)		β (SE)	β (SE)		β (SE)	β (SE)
Severity index (n = 5,370)a, score	0.08 (0.01)***	0.13 (0.01)***		0.06 (0.01)***	0.06 (0.01)***		0.01 (0.01)	0.09 (0.01)***
Any exposure (n = 4,613), yes vs no	0.07 (0.01)***	0.13 (0.01)***		0.05 (0.01)***	0.06 (0.01)***		0.00 (0.01)	0.09 (0.01)***
Chronicity (n = 4,613)
none (reference)
unstable	0.06 (0.02)***	0.10 (0.02)***		0.04 (0.01)**	0.04 (0.01)**		0.01 (0.01)	0.07 (0.01)***
stable	0.06 (0.02)***	0.13 (0.02)***		0.04 (0.02)**	0.07 (0.02)***		-0.01 (0.01)	0.10 (0.01)***
Type (n = 4,882)b
none (reference)
overt only	0.05 (0.01)**	0.10 (0.02)***		0.03 (0.01)**	0.05 (0.01)***		-0.01 (0.01)	0.07 (0.01)***
relational only	0.03 (0.02)*	0.04 (0.01)**		0.02 (0.01)	0.03 (0.01)*		0.01 (0.01)	0.02 (0.01)
both	0.05 (0.01)***	0.09 (0.02)**		0.04 (0.01)**	0.05 (0.01)***		0.00 (0.01)	0.06 (0.01)***
Note: Model A presents linear regression results controlling for sex and early-life environmental risk exposure; Model B is similar to model A, additionally controlling for pre-existing psychopathology (GP, INT, or EXT); Model C is similar to model A, additionally controlling the internalizing factor for the externalizing factor and vice versa.
a Summed across time points (age 8 and 10 years).
b Measured at age 10
*p<0.05; **p <0.01; ***p<0.001
INT = internalizing factor; EXT = externalizing factor

[truncated: 2 more sheets: TS5.Complete_cases, TS6.Regression_min_full]
